# Supplementary material for: The Prediction of Medium- and Long-Term Trends in Urban Carbon Emissions Based on an ARIMA-BPNN Combination Model
Source: MDPI journal article supplement (doi:10.3390/en17081856), 2024-04-12
Supplement: s1 [file s1]

Archive with 2 entries (2 files):
- File S1.pdf
- File S2.pdf
