# Supplementary material for: The Prediction of Medium- and Long-Term Trends in Urban Carbon Emissions Based on an ARIMA-BPNN Combination Model
Source: MDPI journal article supplement (doi:10.3390/en17081856), 2024-04-12
Supplement: s1 [file s1]

## Supplementary Material File S1. Parameter settings

### (1) Total energy consumption

Though there is a lack of constraints on the total energy consumption in relevant policy documents, it can be determined based on the product of energy consumption per unit of GDP and GDP, which are given constraints in relevant policy documents. To predict the future total energy consumption, GDP and energy consumption per unit of GDP can firstly be predicted. In terms of GDP, the "The 14th Five-Year Plan" mentions that the average annual growth rate of regional GDP is about 6%, and the per capita GDP of the city will double on the basis of 2020. According to the statement, the real level of GDP per capita in China will double by 2050 compared to 2020[1]. Based on the prediction of the permanent population, the average annual GDP growth rate under the baseline scenario is estimated to be 6% from 2021 to 2025, 7.78% from 2026 to 2030, 6.66% from 2031 to 2035, 4.87% from 2036 to 2045, 3.48% from 2046 to 2050, 3.01% from 2051 to 2055, and 3.01% from 2056 to 2060. The GDP growth rate under the low-carbon scenario is slower compared to the baseline scenario, and the demonstration scenario is a bit slower compared to the low-carbon scenario. The GDP growth rate forecast for each scenario is shown in Table S1. The determination of energy consumption per unit of GDP is detailed below and will not be elaborated here.

### (2) Carbon emission intensity

By 2025, Suzhou City will achieve the national goals ("The 14th Five-Year Plan" of the People's Republic of China) that the carbon emission intensity in 2025 will decrease by 18% compared to 2020. Scholars [2] have proposed that the carbon emission intensity in China by 2060 will be about 2% of that in 2020. Based on this, the average annual decrease rate of carbon emissions under the baseline scenario is estimated to be 3.89% from 2021 to 2025, 4.6% from 2026 to 2030, 8.8% from 2031 to 2035, 10.0% from 2036 to 2045, 11.5% from 2046 to 2050, 13% from 2051 to 2055, and 12% from 2056 to 2060. The carbon emission intensity under the low-carbon scenario decreases faster, and the demonstration scenario is even more severe. The prediction of carbon emission intensity reduction in each scenario is shown in Table S1.

### (3) Total social electricity consumption

At present, there are few policy documents regarding the overall electricity consumption in society, lacking direct constraints. The overall electricity consumption in Suzhou City (Shown in Appendix B) is predicted with a Logistic model by taking into account medium-and long-term macro policy factors. The growth rate of electricity consumption in the benchmark scenario is relatively fast, while in the low-carbon scenario, the growth rate has decreased. The demonstration scenario has the lowest growth rate. The changes in social electricity consumption under three scenarios are shown in Table S2.

### (4) Total population

According to the "Suzhou Municipal Government's Overall Plan for Land and Space (2021-2035) ", the permanent population in the city will be between 17-18 million by 2035, and is expected to peak around 2035. With the comprehensive implementation of the "three-child" policy and the acceleration of urbanization, a large number of people are entering, and the

permanent population of Suzhou may grow rapidly in the near future. After comprehensive consideration, the average annual growth rate of the population in the benchmark scenario is determined to be 3.7% from 2021 to 2025, 1.2% from 2026 to 2030, 1.00% from 2031 to 2035, -0.6% from 2036 to 2045, -0.5% from 2046 to 2050, and -0.4% from 2051 to 2060. The low-carbon scenario assumes a lower population growth rate than the baseline scenario, while the demonstration scenario assumes a lower population growth rate. The predicted growth rate of permanent residents under each scenario is shown in Table S1.

#### (5) Energy structure

The energy consumption structure in this work refers to the proportion of industrial coal consumption to the total energy consumption. The "Comprehensive Work Plan for Energy Conservation and Emission Reduction" during the 14th Five Year Plan period mentions that coal consumption in the Yangtze River Delta region will decrease by about 5%. For a long period of time, China's energy will still be dominated by coal, and the proportion of coal in 2030 cannot be less than 44% [2]. The proportion of non-fossil energy consumption will reach over 80% by 2060[3]. Taking into account the proportion of natural gas and other fossil energy sources, and the need for coal as a backup, the proportion of coal consumption will be approximate 13% by 2060. Therefore, it is estimated that the decline rate in energy structure for benchmark scenario will be 3.9% in 2021-2025, 4.2% in 2026-2030, 5% in 2031-2035, 5.2% in 2036-2045, 3% in 2046 - 2055, and 1.6% from 2056 to 2060. The energy structure decline rate in the low-carbon scenario is faster than that in the baseline scenario, and the demonstration scenario is more aggressive compared to the low-carbon scenario. The predicted energy structure decline rate in each scenario is shown in Table S1.

#### (6) Energy consumption per unit of GDP

According to "The 14th Five-Year Plan" in Jiangsu Province, by 2025, the energy consumption per unit of GDP in Jiangsu Province will decrease by 13.5% compared to 2020, and the case for Suzhou City will be the same with Jiangsu Province. In addition, the energy intensity per unit of GDP will decrease by more than 80% in 2050 compared to 2005[3]. Therefore, the average annual decrease rate of energy consumption per unit of GDP in Suzhou City under the benchmark scenario is 3% from 2021 to 2025, 4.2% from 2026 to 2030, 5.6% from 2031 to 2035, 4.6% from 2036 to 2045, 3.2% from 2046 to 2055, and 2.2% from 2056 to 2060. The decrease rate in energy consumption per unit of GDP in the low-carbon scenario is faster than the baseline scenario, and the demonstration scenario is more aggressive compared to the low-carbon scenario. The predicted growth rate of energy consumption per unit of GDP in each scenario is shown in Table S1.

**Table S1.** Changes in various influencing factors under three scenarios

| Scenarios                     | Influence factors                      | 2021-<br>2025 | 2026-<br>2030  | 2031-<br>2035  | 2036-<br>2045   | 2046-<br>2050   | 2051-<br>2055   | 2056-<br>2060   |
|-------------------------------|----------------------------------------|---------------|----------------|----------------|-----------------|-----------------|-----------------|-----------------|
| Benchmark<br>scenario         | Permanent population                   | 3.70%         | 1.20<br>%      | 1.00<br>%      | -<br>0.60<br>%  | -<br>0.50<br>%  | -<br>0.40<br>%  | -<br>0.40<br>%  |
|                               | Energy consumption p<br>er unit of GDP | 3.00%         | 4.20<br>%      | 5.60<br>%      | 4.60<br>%       | 3.20<br>%       | 3.20<br>%       | 2.20<br>%       |
|                               | Carbon emission<br>intensity           | -3.89%        | -<br>4.60<br>% | -<br>8.80<br>% | -<br>10.00<br>% | -<br>11.50<br>% | -<br>13.00<br>% | -<br>12.00<br>% |
|                               | Energy structure                       | -5.50%        | -<br>4.50<br>% | -<br>5.60<br>% | -<br>5.20<br>%  | -<br>3.00<br>%  | -<br>3.00<br>%  | -<br>1.60<br>%  |
|                               | GDP                                    | 6.00%         | 7.80<br>%      | 6.60<br>%      | 4.60<br>%       | 3.20<br>%       | 3.20<br>%       | 2.20<br>%       |
|                               |                                        |               |                |                |                 |                 |                 |                 |
| Low-<br>carbon<br>scenario    | Permanent population                   | 3.30%         | 1.00<br>%      | 0.80<br>%      | -<br>0.70<br>%  | -<br>0.70<br>%  | -<br>0.50<br>%  | -<br>0.50<br>%  |
|                               | Energy consumption p<br>er unit of GDP | -3.10%        | -<br>4.30<br>% | -<br>5.70<br>% | -<br>4.70<br>%  | -<br>3.70<br>%  | -<br>3.30<br>%  | -<br>2.30<br>%  |
|                               | Carbon emission<br>intensity           | -4.10%        | -<br>4.90<br>% | -<br>9.20<br>% | -<br>10.40<br>% | -<br>12.10<br>% | -<br>13.90<br>% | -<br>12.30<br>% |
|                               | Energy structure                       | -5.70%        | -<br>4.70<br>% | -<br>5.90<br>% | -<br>5.70<br>%  | -<br>3.80<br>%  | -<br>3.60<br>%  | -<br>2.00<br>%  |
|                               | GDP                                    | 5.70%         | 7.40<br>%      | 6.30<br>%      | 4.50<br>%       | 3.10<br>%       | 3.00<br>%       | 2.00<br>%       |
|                               |                                        |               |                |                |                 |                 |                 |                 |
| Demonstrat<br>ion<br>scenario | Permanent population                   | 3.00%         | 0.80<br>%      | 0.60<br>%      | -<br>0.75<br>%  | -<br>0.90<br>%  | -<br>0.70<br>%  | -<br>0.70<br>%  |
|                               | Energy consumption p<br>er unit of GDP | -3.50%        | -<br>4.70<br>% | -<br>6.00<br>% | -<br>5.20<br>%  | -<br>4.20<br>%  | -<br>3.80<br>%  | -<br>2.80<br>%  |
|                               | Carbon emission<br>intensity           | -4.50%        | -<br>5.30<br>% | -<br>9.60<br>% | -<br>10.90<br>% | -<br>13.70<br>% | -<br>14.70<br>% | -<br>13.00<br>% |
|                               | Energy structure                       | -5.90%        | -<br>5.00<br>% | -<br>6.40<br>% | -<br>6.30<br>%  | -<br>4.20<br>%  | -<br>4.00<br>%  | -<br>2.40<br>%  |
|                               |                                        |               |                |                |                 |                 |                 |                 |
|                               |                                        |               |                |                |                 |                 |                 |                 |

|     |       |           |           |           |           |           |           |
|-----|-------|-----------|-----------|-----------|-----------|-----------|-----------|
| GDP | 5.40% | 7.00<br>% | 6.00<br>% | 4.20<br>% | 2.80<br>% | 2.50<br>% | 1.70<br>% |
|-----|-------|-----------|-----------|-----------|-----------|-----------|-----------|

**Table S2.** Changes in Electricity consumption in the whole society under three scenarios

| Year | Benchmark scenario       |                                      | Low-carbon scenario      |                                      | Demonstration scenario   |                                      |
|------|--------------------------|--------------------------------------|--------------------------|--------------------------------------|--------------------------|--------------------------------------|
|      | Total energy consumption | Total social electricity consumption | Total energy consumption | Total social electricity consumption | Total energy consumption | Total social electricity consumption |
| 2021 | 90075550.07              | 21282460.62                          | 89728020.69              | 21011387.41                          | 89104009.66              | 20655197                             |
| 2022 | 92615680.59              | 23001937.34                          | 91902399.82              | 22629301.17                          | 90628579.27              | 22143909                             |
| 2023 | 95227442.78              | 24832374.57                          | 94129470.67              | 24334667.95                          | 92179234.26              | 23692669                             |
| 2024 | 97912856.66              | 26776413.5                           | 96410510.14              | 26126598.91                          | 93756420.96              | 25297369                             |
| 2025 | 100673999.2              | 28836019.49                          | 98746826.03              | 28003307.84                          | 95360593.32              | 26953048                             |
| 2026 | 103947237.1              | 31012369.92                          | 101493765.2              | 29962050.17                          | 97240150.61              | 28653928                             |
| 2027 | 107326898.6              | 33305743.35                          | 104317118.8              | 31999079.07                          | 99156753.98              | 30393469                             |
| 2028 | 110816443.8              | 35715413.69                          | 107219012.4              | 34109622.61                          | 101111133.6              | 32164455                             |
| 2029 | 114419445.4              | 38239553.73                          | 110201630.9              | 36287885.2                           | 103104034                | 33959105                             |
| 2030 | 118139592.3              | 40875152.37                          | 113267219.9              | 38527076.03                          | 105136214.6              | 35769200                             |
| 2031 | 118901742                | 43617950.49                          | 113540080.6              | 40819466.04                          | 104757724.2              | 37586232                             |
| 2032 | 119668808.6              | 46462399.98                          | 113813598.7              | 43156473.75                          | 104380596.4              | 39401560                             |
| 2033 | 120440823.6              | 49401650.18                          | 114087775.6              | 45528778.99                          | 104004826.2              | 41206579                             |
| 2034 | 121217819.2              | 52427565.25                          | 114362613.1              | 47926461.76                          | 103630408.9              | 42992874                             |
| 2035 | 121999827.3              | 55530775.09                          | 114638112.6              | 50339162.41                          | 103257339.4              | 44752383                             |
| 2036 | 121740069.5              | 58700760.86                          | 114166376.8              | 52756257.82                          | 101999252                | 46477532                             |
| 2037 | 121480864.8              | 61925975.04                          | 113696582.1              | 55167047.29                          | 100756493.1              | 48161360                             |
| 2038 | 121222212                | 65193993.83                          | 113228720.7              | 57560941.37                          | 99528875.96              | 49797618                             |
| 2039 | 120964109.9              | 68491698.48                          | 112762784.5              | 59927646.49                          | 98316216.14              | 51380844                             |
| 2040 | 120706557.3              | 71805480.13                          | 112298765.6              | 62257338.73                          | 97118331.36              | 52906411                             |
| 2041 | 120449553.1              | 75121461.73                          | 111836656.2              | 64540820.52                          | 95935041.61              | 54370550                             |
| 2042 | 120193096.1              | 78425729.36                          | 111376448.4              | 66769655.27                          | 94766169.07              | 55770350                             |
| 2043 | 119937185.1              | 81704564.92                          | 110918134.3              | 68936276.27                          | 93611538.06              | 57103734                             |
| 2044 | 119681819.1              | 84944671.84                          | 110461706.2              | 71034067.35                          | 92470975.08              | 58369420                             |
| 2045 | 119426996.7              | 88133386.11                          | 110007156.3              | 73057414.73                          | 91344308.72              | 59566863                             |
| 2046 | 119317824.7              | 91258865.63                          | 109220935.1              | 75001730.47                          | 89958067.49              | 60696189                             |
| 2047 | 119208752.4              | 94310252.24                          | 108440333.1              | 76863449.33                          | 88592863.86              | 61758122                             |
| 2048 | 119099779.9              | 97277802.27                          | 107665310                | 78640001.92                          | 87248378.56              | 62753907                             |
| 2049 | 118990907                | 100152983.1                          | 106895826.1              | 80329767.45                          | 85924297.17              | 63685225                             |
| 2050 | 118882133.6              | 102928534.8                          | 106131841.6              | 81932010.06                          | 84620310.03              | 64554126                             |
| 2051 | 118766750.6              | 105598498.3                          | 105708375.5              | 83446802.78                          | 83439856.71              | 65362946                             |
| 2052 | 118651479.6              | 108158210.5                          | 105286599.1              | 84874942.94                          | 82275870.71              | 66114242                             |
| 2053 | 118536320.4              | 110604272.3                          | 104866505.6              | 86217862.88                          | 81128122.31              | 66810732                             |
| 2054 | 118421273                | 112934490.9                          | 104448088.2              | 87477539.08                          | 79996385                 | 67455233                             |
| 2055 | 118306337.3              | 115147802.5                          | 104031340.4              | 88656402.55                          | 78880435.43              | 68050618                             |
| 2056 | 118237043.9              | 117244179.4                          | 103671391.9              | 89757252.8                           | 77975203.56              | 68599772                             |

|      |             |             |             |             |             |          |
|------|-------------|-------------|-------------|-------------|-------------|----------|
| 2057 | 118167791   | 119224527.1 | 103418433.7 | 90783176.95 | 77080360.12 | 69105554 |
| 2058 | 118098578.7 | 121090574.3 | 103166092.7 | 91737475.41 | 76195785.91 | 69570771 |
| 2059 | 118029407   | 122844760.9 | 102914367.5 | 92623594.76 | 75321363.07 | 69998155 |
| 2060 | 117960275.7 | 124490126.8 | 102663256.4 | 93445068.26 | 74456975.11 | 70390342 |

\* The unit of total energy consumption is 10,000 tons of standard coal; The unit of electricity consumption of the whole society is 10,000 kWh.

## Reference

1. Liu, W.; Chen, Y. Economic development between the "two centuries": tasks, challenges and response strategies. *Social Sciences in China* 2021, 86-102.
2. Wei, Y.; Yu, B.; Tang, B.; Liu, L.; Liao, H.; Chen, J.; Sun, F.; Runying, A.; Wu, Y.; Tan, J.; et al. Roadmap for Achieving China's Carbon Peak and Carbon Neutrality Pathway. *Journal of Beijing Institute of Technology (Social Sciences Edition)* 2022, 24, 13-26, doi:<https://doi.org/10.15918/j.jbitss1009-3370.2022.1165>.
3. He, J.; Li, Z.; Zhang, X.; Wang, C.; Wang, H.; Wang, X.; Tian, Z.; Bai, Q.; Cong, J.; Du, E. China's Long-term Low-carbon Development Strategies and Pathways Comprehensive Report. *China Population, Resources and Environment* 2020, 30, 1-25, doi:<https://doi.org/10.12062/cpre.20201025>.
